# Supplementary material for: Coral geometry and why it matters
Source: PeerJ journal article supplement (doi:10.7717/peerj.17037), 2024-02-29
Supplement: Appendix_A_231018.pdf [file Appendix_A_231018.pdf]

## Appendix A: Geometric relationships between coral colony parameters

### Circular hemisphere

Constants

- Calcification rate, G
- Density,  $\rho$

Radius,  $r_t$

Linear extension rate,  $C_t$

Surface area,  $S = 2\pi r^2$

Planar area,  $P = \pi r^2 = \frac{S}{2}$

Volume,  $V = \frac{2}{3}\pi r^3$

Change in Mass,  $\Delta M = \Delta V\rho = GS_1$

$$\Delta V = \frac{GS_1}{\rho} = V_2 - V_1 = \frac{2\pi}{3}(r_2^3 - r_1^3)$$

$$\rightarrow \frac{2\pi r_2^3}{3} = \frac{2G\pi r_1^2}{\rho} - \frac{2\pi r_1^3}{3}$$

$$\rightarrow r_2 = \left(\frac{3Gr_1^2}{\rho} + r_1^3\right)^{1/3}$$

### Surface area productivity

$$\frac{\Delta S}{S_1} = \frac{S_2 - S_1}{S_1} = \frac{S_2}{S_1} - 1 = \frac{r_2^2}{r_1^2} - 1$$

$$\rightarrow \frac{\Delta S}{S_1} = \frac{\left(\frac{3Gr_1^2}{\rho} + r_1^3\right)^{2/3}}{r_1^2} - 1$$

### Planar area productivity

$$\frac{\Delta P}{S_1} = \frac{\Delta S}{2S_1} = \frac{\left(\frac{3Gr_1^2}{\rho} + r_1^3\right)^{2/3}}{2r_1^2} - \frac{1}{2}$$

### Surface area to volume ratio

$$\frac{S}{V} = \frac{2\pi r^2}{\frac{2}{3}\pi r^3} = \frac{3}{r}$$

### Linear extension rate

$$C_t = r_{t+1} - r_t$$

$$\rightarrow r_{t+1} = C_t + r_t$$

$$G = \frac{\Delta V\rho}{S_t} = \frac{\rho(V_{t+1} - V_t)}{S_t} = \frac{\rho\left(\frac{2}{3}\pi r_{t+1}^3 - \frac{2}{3}\pi r_t^3\right)}{2\pi r_t^2} = \frac{\rho(r_{t+1}^3 - r_t^3)}{3r_t^2} = \frac{\rho((C_t + r_t)^3 - r_t^3)}{3r_t^2} = \frac{\rho(3C_t r_t^2 + 3C_t^2 r_t + C_t^3)}{3r_t^2}$$

$$\text{As } r_t \rightarrow \infty, \quad G \rightarrow \rho C_t \quad \text{Therefore } C_t \rightarrow \frac{G}{\rho}$$

### Flat disk

Constants

- Calcification rate, G
- Density,  $\rho$
- Thickness, h

Radius,  $r_t$

Linear extension rate,  $C_t$

Surface area,  $S = \pi r^2$

Planar area,  $P = S = \pi r^2$

Volume,  $V = h\pi r^2$

Change in Mass,  $\Delta M = \Delta V\rho = GS_1$

$$\Delta V = \frac{GS_1}{\rho} = V_2 - V_1 = h\pi(r_2^2 - r_1^2)$$

$$\rightarrow r_2^2 = r_1^2 + \frac{Gr_1^2}{\rho h} = r_1^2 \left( \frac{G}{\rho h} + 1 \right)$$

### Surface area productivity

$$\frac{\Delta S}{S_1} = \frac{S_2 - S_1}{S_1} = \frac{S_2}{S_1} - 1 = \frac{r_2^2}{r_1^2} - 1 = \frac{r_1^2 \left( \frac{G}{\rho h} + 1 \right)}{r_1^2} - 1 = \left( \frac{G}{\rho h} + 1 \right) - 1 = \frac{G}{\rho h}$$

$$\rightarrow \frac{\Delta S}{S_1} = \frac{G}{\rho h}$$

### Surface area to volume ratio

$$\frac{S}{V} = \frac{\pi r^2}{h\pi r^2} = \frac{1}{h}$$

### Linear extension rate

$$C_t = r_{t+1} - r_t$$

$$\rightarrow r_{t+1} = C_t + r_t$$

$$G = \frac{\Delta V\rho}{S_t} = \frac{\rho(V_{t+1} - V_t)}{S_t} = \frac{\rho(h\pi r_{t+1}^2 - h\pi r_t^2)}{\pi r_t^2} = \frac{\rho h(r_{t+1}^2 - r_t^2)}{r_t^2} = \rho h \left( \frac{r_{t+1}^2}{r_t^2} - 1 \right)$$

$$\rightarrow r_{t+1} = r_t \sqrt{\frac{G}{\rho h} + 1}$$

$$\rightarrow C_t + r_t = r_t \sqrt{\frac{G}{\rho h} + 1}$$

$$\rightarrow C_t = r_t \left( \sqrt{\frac{G}{\rho h} + 1} - 1 \right)$$

$$\text{As } r_t \rightarrow \infty, \quad C_t \rightarrow \infty$$

### Cone (single branch)

Constants

- Calcification rate,  $G$
- Density,  $\rho$
- Aspect ratio,  $\alpha = h/r$

Radius,  $r = h/\alpha$

Height,  $h = \alpha r$  (branch length)

Linear extension rate,  $C_t$

$$\text{Surface area, } S = \pi r \sqrt{h^2 + r^2} = \frac{\pi h}{\alpha} \sqrt{h^2 + \frac{h^2}{\alpha^2}} = \frac{\pi h^2}{\alpha} \sqrt{1 + \frac{1}{\alpha^2}} \quad (3\text{-sides, excluding basal attachment})$$

$$\text{Volume, } V = \frac{1}{3} h\pi r^2 = \frac{\pi h^3}{3\alpha^2}$$

$$\text{Change in Mass, } \Delta M = \Delta V\rho = GS_1$$

$$\Delta V = \frac{GS_1}{\rho} = V_2 - V_1 = \frac{\pi}{3\alpha^2} (h_2^3 - h_1^3)$$

$$\rightarrow \frac{3G\alpha^2 S_1}{\rho\pi} = h_2^3 - h_1^3$$

$$\rightarrow h_2^3 = \frac{3G\alpha^2 S_1}{\rho\pi} + h_1^3 = \frac{3Gh^2\alpha\sqrt{1+\frac{1}{\alpha^2}}}{\rho} + h_1^3$$

$$\rightarrow h_2 = \sqrt[3]{\frac{3Gh^2\alpha\sqrt{1+\frac{1}{\alpha^2}}}{\rho} + h_1^3}$$

### Surface area productivity

$$\frac{\Delta S}{S_1} = \frac{S_2 - S_1}{S_1} = \frac{S_2}{S_1} - 1 = \frac{\frac{\pi h_2^2}{\alpha} \sqrt{1+\frac{1}{\alpha^2}}}{\frac{\pi h_1^2}{\alpha} \sqrt{1+\frac{1}{\alpha^2}}} - 1 = \frac{h_2^2}{h_1^2} - 1 = \frac{\left(\frac{3Gh_1^2\alpha\sqrt{1+\frac{1}{\alpha^2}}}{\rho} + h_1^3\right)^{2/3}}{h_1^2} - 1 = \left(\frac{3G\alpha\sqrt{1+\frac{1}{\alpha^2}}}{\rho h_1} + 1\right)^{2/3} - 1$$

Define  $L = \alpha\sqrt{1+\frac{1}{\alpha^2}}$

$$\rightarrow \frac{\Delta S}{S_1} = \left(\frac{3GL}{\rho h_1} + 1\right)^{2/3} - 1$$

### Surface area to volume ratio

$$\frac{S}{V} = \frac{\frac{\pi h^2}{\alpha} \sqrt{1+\frac{1}{\alpha^2}}}{\frac{\pi h^3}{3\alpha^2}} = \frac{3\alpha\sqrt{1+\frac{1}{\alpha^2}}}{h} = \frac{3L}{r}$$

### Linear extension rate

$$C_t = h_{t+1} - h_t$$

$$G = \frac{\Delta V \rho}{S_t} = \frac{\rho(V_{t+1} - V_t)}{S_t} = \frac{\rho\left(\frac{\pi h_{t+1}^3}{3\alpha^2} - \frac{\pi h_t^3}{3\alpha^2}\right)}{\frac{\pi h_t^2}{\alpha} \sqrt{1+\frac{1}{\alpha^2}}} = \frac{\rho(h_{t+1}^3 - h_t^3)}{3h_t^2\alpha\sqrt{1+\frac{1}{\alpha^2}}} = \frac{\rho(h_{t+1}^3 - h_t^3)}{3h_t^2 L}$$

$$\rightarrow \frac{3GL}{\rho} h_t^2 = h_{t+1}^3 - h_t^3$$

$$\rightarrow h_{t+1} = \sqrt[3]{\frac{3GL}{\rho} h_t^2 + h_t^3}$$

$$\rightarrow C_t = \sqrt[3]{\frac{3GL}{\rho} h_t^2 + h_t^3} - h_t$$

## Cylinder (single branch tip)

Constants

- Calcification rate, G
- Density,  $\rho$
- Branch radius, r

Total number of branches,  $\beta_t$

Total branch length,  $h_t$

Linear extension rate,  $C_t$

Surface area,  $S = 2\pi rh + \pi r^2$

Volume,  $V = h\pi r^2$

Change in Mass,  $\Delta M = \Delta V\rho = GS_1$

$$\Delta V = \frac{GS_1}{\rho} = V_2 - V_1 = h\pi r^2(h_2 - h_1)$$

$$\rightarrow \frac{GS_1}{\rho\pi r^2} = h_2 - h_1$$

$$\rightarrow h_2 = \frac{GS_1}{\rho\pi r^2} + h_1$$

## Surface area productivity

$$\frac{\Delta S}{S_1} = \frac{S_2 - S_1}{S_1} = \frac{S_2}{S_1} - 1 = \frac{2\pi rh_2 + \pi r^2}{2\pi rh_1 + \pi r^2} - 1 = \frac{2h_2 + r}{2h_1 + r} - 1 = \frac{2\left(\frac{GS_1}{\rho\pi r^2} + h_1\right) + r}{2h_1 + r} - 1 = \frac{\frac{2GS_1}{\rho\pi r^2} + 2h_1 + r}{2h_1 + r} - 1$$

$$= \frac{2GS_1}{\rho\pi r^2(2h_1 + r)} = \frac{2G(2\pi rh_1 + \pi r^2)}{\rho\pi r^2(2h_1 + r)} = \frac{2G\pi r(2h_1 + r)}{\rho\pi r^2(2h_1 + r)}$$

$$\rightarrow \frac{\Delta S}{S_1} = \frac{2G}{\rho r}$$

## Surface area to volume ratio

$$\frac{S}{V} = \frac{2\pi rh + \pi r^2}{h\pi r^2} = \frac{2h + r}{hr} = \frac{2}{r} + \frac{1}{h}$$

$$\text{as } h \rightarrow \infty, \frac{S}{V} \rightarrow \frac{2}{r}$$

## Linear extension rate

$$C_t = h_{t+1} - h_t$$

$$G = \frac{\Delta V\rho}{S_t} = \frac{\rho(V_{t+1} - V_t)}{S_t} = \frac{\rho(h_{t+1}\pi r^2 - h_t\pi r^2)}{2\pi rh_t + \pi r^2} = \frac{\rho r(h_{t+1} - h_t)}{2h_t + r} = \frac{\rho r(C_t + h_t - h_t)}{2h_t + r} = \frac{\rho r C_t}{2h_t + r}$$

$$\rightarrow G(2h_t + r) = \rho r C_t$$

$$\rightarrow C_t = \frac{2Gh_t}{\rho r} + \frac{G}{\rho}$$

$$\rightarrow \frac{C_t}{\beta_t} = \frac{2G}{\rho r} \frac{h_t}{\beta_t} + \frac{G}{\rho\beta_t}, \text{ where } \frac{C_t}{\beta_t} \text{ is average branch extension rate and } \frac{h_t}{\beta_t} \text{ is average branch length}$$

$$\text{As } \beta_t \rightarrow \infty, \frac{C_t}{\beta_t} \rightarrow \frac{2G}{\rho r} \frac{h_t}{\beta_t}$$

## Prolate hemispheroid (c>a)

Constants

- Calcification rate, G
- Density,  $\rho$

- Eccentricity,  $e = \sqrt{1 - \frac{a^2}{c^2}}$ ,  $c > a$   
 $\rightarrow c = \frac{a}{\sqrt{1-e^2}}$

Equatorial radius,  $a=b$

Polar radius,  $c$

Surface area,  $S = \pi a^2 + \frac{\pi a c}{e} \sin^{-1} e$

Volume,  $V = \frac{2}{3} \pi a^2 c$

Change in Mass,  $\Delta M = \Delta V \rho = G S_1$

$$\Delta V = \frac{G S_1}{\rho} = \frac{G}{\rho} \left( \pi a_1^2 + \frac{\pi a_1 c_1}{e} \sin^{-1} e \right) = \frac{G \pi}{\rho} \left( a_1^2 + \frac{a_1 c_1}{e} \sin^{-1} e \right)$$

$$V_2 = V_1 + \Delta V = \frac{2}{3} \pi a_1^2 c_1 + \frac{G \pi}{\rho} \left( a_1^2 + \frac{a_1 c_1}{e} \sin^{-1} e \right)$$

$$V_2 = \frac{2}{3} \pi a_2^2 c_2$$

$$\rightarrow a_2^2 = \frac{3V_2}{2\pi c_2} = \frac{3V_2 \sqrt{1-e^2}}{2\pi a_2}$$

$$\rightarrow a_2^3 = \frac{3V_2 \sqrt{1-e^2}}{2\pi}$$

$$\rightarrow a_2 = \left( \frac{3V_2 \sqrt{1-e^2}}{2\pi} \right)^{1/3} = \left( \left( \frac{3\sqrt{1-e^2}}{2\pi} \right) \left( \frac{2}{3} \pi a_1^2 c_1 + \frac{G \pi}{\rho} \left( a_1^2 + \frac{a_1 c_1}{e} \sin^{-1} e \right) \right) \right)^{1/3}$$

$$= \left( \left( \frac{3\sqrt{1-e^2}}{2\pi} \right) \left( \frac{2\pi a_1^3}{3\sqrt{1-e^2}} + \frac{G \pi}{\rho} \left( a_1^2 + \frac{a_1^2}{e\sqrt{1-e^2}} \sin^{-1} e \right) \right) \right)^{1/3}$$

$$= \left( \left( a_1^3 + \frac{3G a_1^2 \sqrt{1-e^2}}{2\rho} \left( 1 + \frac{\sin^{-1} e}{e\sqrt{1-e^2}} \right) \right) \right)^{1/3}$$

### Surface area productivity

$$\frac{\Delta S}{S_1} = \frac{S_2 - S_1}{S_1} = \frac{S_2}{S_1} - 1 = \frac{\pi a_2^2 + \frac{\pi a_2 c_2}{e} \sin^{-1} e}{\pi a_1^2 + \frac{\pi a_1 c_1}{e} \sin^{-1} e} - 1 = \frac{a_2^2 + \frac{a_2^2}{e} \sin^{-1} e}{a_1^2 + \frac{a_1^2}{e} \sin^{-1} e} - 1 = \frac{a_2^2 \left( 1 + \frac{\sin^{-1} e}{e\sqrt{1-e^2}} \right)}{a_1^2 \left( 1 + \frac{\sin^{-1} e}{e\sqrt{1-e^2}} \right)} - 1$$

$$= \frac{\left( \left( a_1^3 + \frac{a_1^2 3G \sqrt{1-e^2}}{2\rho} \left( 1 + \frac{\sin^{-1} e}{e\sqrt{1-e^2}} \right) \right) \right)^{2/3} \left( 1 + \frac{\sin^{-1} e}{e\sqrt{1-e^2}} \right)}{a_1^2 \left( 1 + \frac{\sin^{-1} e}{e\sqrt{1-e^2}} \right)} - 1 = \frac{\left( \left( a_1^3 + \frac{a_1^2 3G \sqrt{1-e^2}}{2\rho} \left( 1 + \frac{\sin^{-1} e}{e\sqrt{1-e^2}} \right) \right) \right)^{2/3}}{a_1^2} - 1$$

$$\text{Define } J = \left( 1 + \frac{\sin^{-1} e}{e\sqrt{1-e^2}} \right)$$

$$\rightarrow \frac{\Delta S}{S_1} = \frac{\left( \left( a_1^3 + \frac{a_1^2 3G \sqrt{1-e^2}}{2\rho} \right) \right)^{2/3}}{a_1^2} - 1$$

## Planar area productivity

$$\begin{aligned} \frac{\Delta P}{S_1} &= \frac{P_2 - P_1}{S_1} = \frac{\pi a_2^2 - \pi a_1^2}{\pi a_1^2 + \frac{\pi a_1 c_1}{e} \sin^{-1} e} = \frac{a_2^2 - a_1^2}{a_1^2 + \frac{a_1 c_1}{e} \sin^{-1} e} = \frac{\left( \left( a_1^3 + \frac{3Ga_1^2 \sqrt{(1-e^2)}}{2\rho} \left( 1 + \frac{\sin^{-1} e}{e \sqrt{(1-e^2)}} \right) \right) \right)^{2/3} - a_1^2}{a_1^2 + \frac{a_1^2}{e \sqrt{(1-e^2)}} \sin^{-1} e} \\ &= \frac{\left( \left( a_1^3 + \frac{3Ga_1^2 \sqrt{(1-e^2)}}{2\rho} \left( 1 + \frac{\sin^{-1} e}{e \sqrt{(1-e^2)}} \right) \right) \right)^{2/3} - a_1^2}{a_1^2 \left( 1 + \frac{\sin^{-1} e}{e \sqrt{(1-e^2)}} \right)} \\ &= \frac{\left( \left( a_1^3 + \frac{a_1^2 3G \sqrt{(1-e^2)}}{2\rho} \right) \right)^{2/3} - a_1^2}{a_1^2} \end{aligned}$$

## Surface area to volume ratio

$$\frac{S}{V} = \frac{\pi a^2 + \frac{\pi a c}{e} \sin^{-1} e}{\frac{2}{3} \pi a^2 c} = \frac{3}{2c} + \frac{3 \sin^{-1} e}{2ae}$$

## Oblate hemispheroid (a>c)

Constants

- Calcification rate, G
- Density,  $\rho$
- Eccentricity,  $e = \sqrt{1 - \frac{c^2}{a^2}}$ ,  $a > c$   
 $\rightarrow c = a\sqrt{1 - e^2}$

Equatorial radius,  $a=b$

Polar radius,  $c$

$$\text{Surface area, } S = \pi a^2 + \frac{\pi c^2}{2e} \ln\left(\frac{1+e}{1-e}\right)$$

$$\text{Volume, } V = \frac{2}{3} \pi a^2 c$$

$$\text{Change in Mass, } \Delta M = \Delta V \rho = G S_1$$

$$\Delta V = \frac{G S_1}{\rho} = \frac{G}{\rho} \left( \pi a_1^2 + \frac{\pi c_1^2}{2e} \ln\left(\frac{1+e}{1-e}\right) \right) = \frac{G \pi}{\rho} \left( a_1^2 + \frac{c_1^2}{2e} \ln\left(\frac{1+e}{1-e}\right) \right)$$

$$V_2 = V_1 + \Delta V = \frac{2}{3} \pi a_1^2 c_1 + \frac{G \pi}{\rho} \left( a_1^2 + \frac{c_1^2}{2e} \ln\left(\frac{1+e}{1-e}\right) \right)$$

$$V_2 = \frac{2}{3} \pi a_2^2 c_2$$

$$\rightarrow a_2^2 = \frac{3V_2}{2\pi c_2} = \frac{3V_2}{2\pi a_2 \sqrt{1-e^2}}$$

$$\rightarrow a_2^3 = \frac{3V_2}{2\pi \sqrt{1-e^2}}$$

$$\begin{aligned} \rightarrow a_2 &= \left( \frac{3V_2}{2\pi \sqrt{1-e^2}} \right)^{1/3} = \left( \frac{3 \left( \frac{2}{3} \pi a_1^2 c_1 + \frac{G \pi}{\rho} \left( a_1^2 + \frac{c_1^2}{2e} \ln\left(\frac{1+e}{1-e}\right) \right) \right)}{2\pi \sqrt{1-e^2}} \right)^{1/3} = \left( \frac{\left( a_1^2 c_1 + \frac{3G}{2\rho} \left( a_1^2 + \frac{c_1^2}{2e} \ln\left(\frac{1+e}{1-e}\right) \right) \right)}{\sqrt{1-e^2}} \right)^{1/3} \\ &= \left( \frac{\left( a_1^3 \sqrt{1-e^2} + \frac{3G}{2\rho} \left( a_1^2 + \frac{a_1^2(1-e^2)}{2e} \ln\left(\frac{1+e}{1-e}\right) \right) \right)}{\sqrt{1-e^2}} \right)^{1/3} = \left( a_1^3 + \frac{3Ga_1^2}{2\rho \sqrt{1-e^2}} \left( 1 + \frac{(1-e^2)}{2e} \ln\left(\frac{1+e}{1-e}\right) \right) \right)^{1/3} \end{aligned}$$

## Surface area productivity

$$\begin{aligned} \frac{\Delta S}{S_1} &= \frac{S_2 - S_1}{S_1} = \frac{S_2}{S_1} - 1 = \frac{\pi a_2^2 + \frac{\pi c_2^2}{2e} \ln\left(\frac{1+e}{1-e}\right)}{\pi a_1^2 + \frac{\pi c_1^2}{2e} \ln\left(\frac{1+e}{1-e}\right)} - 1 = \frac{a_2^2 + \frac{c_2^2}{2e} \ln\left(\frac{1+e}{1-e}\right)}{a_1^2 + \frac{c_1^2}{2e} \ln\left(\frac{1+e}{1-e}\right)} - 1 = \frac{a_2^2 + \frac{a_2^2(1-e^2)}{2e} \ln\left(\frac{1+e}{1-e}\right)}{a_1^2 + \frac{a_1^2(1-e^2)}{2e} \ln\left(\frac{1+e}{1-e}\right)} - 1 \\ &= \frac{a_2^2 \left( \left( 1 + \frac{(1-e^2)}{2e} \right) \ln\left(\frac{1+e}{1-e}\right) \right)}{a_1^2 \left( \left( 1 + \frac{(1-e^2)}{2e} \right) \ln\left(\frac{1+e}{1-e}\right) \right)} - 1 = \frac{a_2^2}{a_1^2} - 1 = \frac{\left( a_1^3 + \frac{3Ga_1^2}{2\rho \sqrt{1-e^2}} \left( 1 + \frac{(1-e^2)}{2e} \ln\left(\frac{1+e}{1-e}\right) \right) \right)^{2/3}}{a_1^2} - 1 \end{aligned}$$

$$\text{Define } K = \frac{(1-e^2)}{2e} \ln\left(\frac{1+e}{1-e}\right)$$

$$\rightarrow \frac{\Delta S}{S_1} = \frac{\left( a_1^3 + \frac{3Ga_1^2(1+K)}{2\rho \sqrt{1-e^2}} \right)^{2/3}}{a_1^2} - 1 = \left( \frac{1}{a_1^2} \right) \left( a_1^3 + \frac{3Ga_1^2(1+K)}{2\rho \sqrt{1-e^2}} \right)^{2/3} - 1$$

$$\rightarrow \frac{\Delta S}{S_1} = a_1^{-2} \left( a_1^3 + \frac{3Ga_1^2(1+K)}{2\rho \sqrt{1-e^2}} \right)^{2/3} - 1$$

## Planar area productivity

$$\begin{aligned}
\frac{\Delta P}{S_1} &= \frac{P_2 - P_1}{S_1} = \frac{\pi a_2^2 - \pi a_1^2}{\pi a_1^2 + \frac{\pi c_1^2}{2e} \ln\left(\frac{1+e}{1-e}\right)} = \frac{a_2^2 - a_1^2}{a_1^2 + \frac{c_1^2}{2e} \ln\left(\frac{1+e}{1-e}\right)} = \frac{\left(a_1^3 + \frac{3Ga_1^2}{2\rho\sqrt{1-e^2}} \left(1 + \frac{(1-e^2)}{2e} \ln\left(\frac{1+e}{1-e}\right)\right)\right)^{2/3} - a_1^2}{a_1^2 + \frac{a_1^2(1-e^2)}{2e} \ln\left(\frac{1+e}{1-e}\right)} \\
&= \frac{\left(a_1^3 + \frac{3Ga_1^2}{2\rho\sqrt{1-e^2}} \left(1 + \frac{(1-e^2)}{2e} \ln\left(\frac{1+e}{1-e}\right)\right)\right)^{2/3} - a_1^2}{a_1^2 \left(1 + \frac{(1-e^2)}{2e} \ln\left(\frac{1+e}{1-e}\right)\right)} \\
&= \frac{\left(a_1^3 + \frac{3Ga_1^2(1+K)}{2\rho\sqrt{1-e^2}}\right)^{2/3} - a_1^2}{a_1^2(1+K)}
\end{aligned}$$

### Surface area to volume ratio

$$\frac{S}{V} = \frac{\pi a^2 + \frac{\pi c^2}{2e} \ln\left(\frac{1+e}{1-e}\right)}{\frac{2}{3}\pi a^2 c} = \frac{3}{2c} + \frac{3c \ln\left(\frac{1+e}{1-e}\right)}{2ea^2}$$
